# Supplementary material for: Association between HSP-Specific T-Cell Counts and Retinal Nerve Fiber Layer Thickness in Patients with Primary Open-Angle Glaucoma
Source: PubMed Central journal article supplement — Ophthalmol Sci. 2023 Apr 17;3(3):100310. doi: 10.1016/j.xops.2023.100310 (PMC10183658; doi:10.1016/j.xops.2023.100310), 2023-04-17

**Supplemental Figure S5:** Correlation of Humphrey visual field (HVF) mean deviation of both eyes and HSP27 or  $\alpha$ -crystallin specific T-cell counts in all POAG patients (A and B) and in POAG patients with HVF MD average better than -12 dB (C and D). Pearson correlation coefficient is represented as r

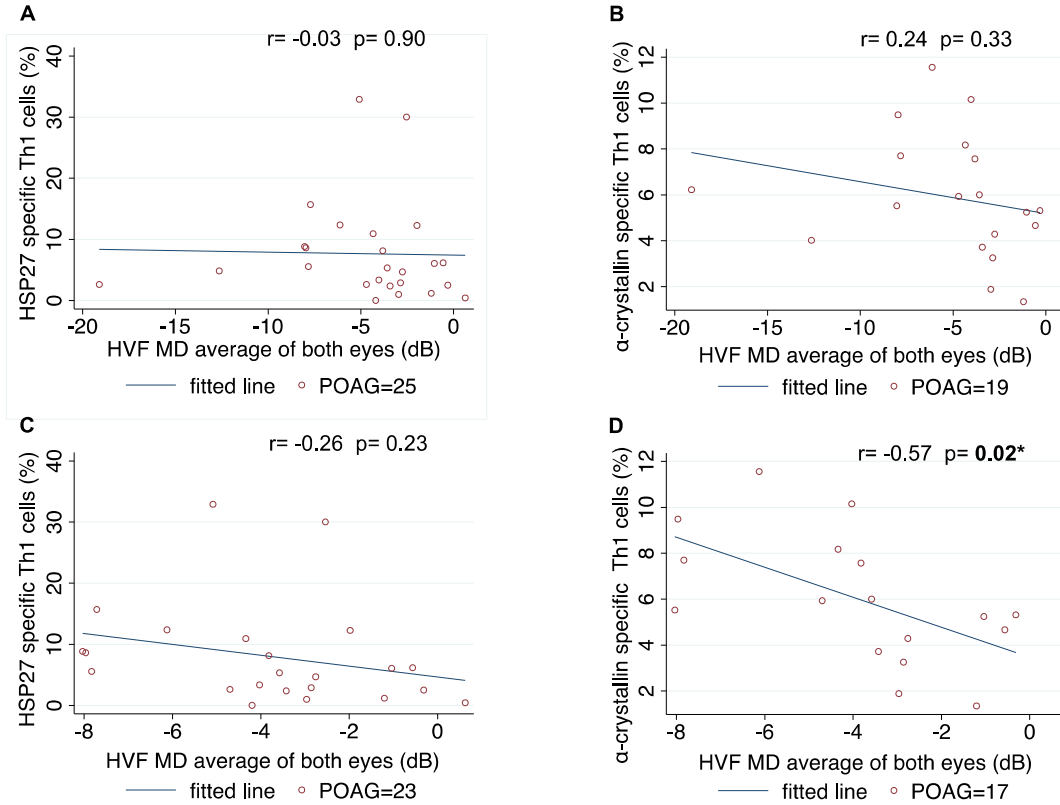

Supplement: mmc1.pdf [file mmc1.pdf]
