# Supplementary material for: Association between HSP-Specific T-Cell Counts and Retinal Nerve Fiber Layer Thickness in Patients with Primary Open-Angle Glaucoma
Source: PubMed Central journal article supplement — Ophthalmol Sci. 2023 Apr 17;3(3):100310. doi: 10.1016/j.xops.2023.100310 (PMC10183658; doi:10.1016/j.xops.2023.100310), 2023-04-17
Supplement: mmc2.pdf [file mmc2.pdf]

**Supplemental Table S3:** Multivariable analysis for T cell count and cytokine level comparisons between POAG and control subjects adjusted for race. Reference category for all analyses is the control group.

|                                                                              | $\beta$ -coefficient | Upper Bound | Lower Bound | P-value          |
|------------------------------------------------------------------------------|----------------------|-------------|-------------|------------------|
| <b>Non-stimulated T cell</b>                                                 |                      |             |             |                  |
| Non-stimulated Th1 cells (%) [n= 23 controls and 26 POAG])                   | -1.9                 | -5.7        | 2.0         | 0.33             |
| Non-stimulated Treg cells (%) [n= 24 controls and 27 POAG])                  | 1.4                  | -0.5        | 3.2         | 0.15             |
| <b>HSP27 stimulated T cell</b>                                               |                      |             |             |                  |
| HSP27 stimulated Th1 cells (%) [n= 21 controls and 28 POAG])                 | 4.8                  | 1.2         | 8.5         | <b>0.01</b>      |
| HSP27 stimulated Treg cells (%) [n= 22 controls and 29 POAG])                | 0.3                  | -0.7        | 1.3         | 0.60             |
| <b><math>\alpha</math>-crystallin stimulated T cell</b>                      |                      |             |             |                  |
| $\alpha$ -crystallin stimulated Th1 cells (%) [n= 13 controls and 20 POAG])  | 3.9                  | 2.2         | 5.6         | <b>&lt;0.001</b> |
| $\alpha$ -crystallin stimulated Treg cells (%) [n= 13 controls and 20 POAG]) | 0.5                  | -0.2        | 1.2         | 0.14             |
| <b>HSP60 stimulated T cell</b>                                               |                      |             |             |                  |
| HSP60 stimulated Th1 cells (%) [n= 16 controls and 13 POAG])                 | 9.2                  | 1.6         | 16.8        | <b>0.02</b>      |
| HSP60 stimulated Treg cells (%) [n= 17 controls and 14 POAG])                | 1.4                  | -0.1        | 2.8         | 0.06             |
| <b>Cytokine measurements</b>                                                 |                      |             |             |                  |
| Interferon- $\gamma$ (pg/ml) [n= 34 controls and 32 POAG])                   | 26.2                 | 21.5        | 30.9        | <b>&lt;0.001</b> |
| TGF- $\beta$ 1 (ng/ml) [n= 24 controls and 32 POAG])                         | 0.4                  | -0.3        | 1.1         | 0.22             |

Significant p-value are in bold.

Abbreviations: POAG, primary open-angle glaucoma; HSP, heat shock protein; Th1 cells, T helper type 1 cells; Treg cells, regulatory T cells; TGF- $\beta$ 1, transforming growth factor beta.
