# Supplementary material for: Association between HSP-Specific T-Cell Counts and Retinal Nerve Fiber Layer Thickness in Patients with Primary Open-Angle Glaucoma
Source: PubMed Central journal article supplement — Ophthalmol Sci. 2023 Apr 17;3(3):100310. doi: 10.1016/j.xops.2023.100310 (PMC10183658; doi:10.1016/j.xops.2023.100310), 2023-04-17
Supplement: mmc3.pdf [file mmc3.pdf]

**Supplemental Table S4:** Heat shock protein (HSP) specific antibody levels in primary open-angle glaucoma (POAG) patients compared to control subjects

| <b>Antibody measurements</b>        | <b>Control<br/>(n=24)</b> | <b>POAG<br/>(n=32)</b> | <b>P-value</b> |
|-------------------------------------|---------------------------|------------------------|----------------|
| Anti-HSP27 antibody                 | 0.1±0.03                  | 0.1±0.04               | 0.45           |
| Anti-HSP60 antibody                 | 0.1±0.03                  | 0.1±0.03               | 0.50           |
| Anti- $\alpha$ -crystallin antibody | 0.1±0.03                  | 0.1±0.04               | 0.89           |

Significant p-value are in bold.
