# Supplementary material for: Association between HSP-Specific T-Cell Counts and Retinal Nerve Fiber Layer Thickness in Patients with Primary Open-Angle Glaucoma
Source: PubMed Central journal article supplement — Ophthalmol Sci. 2023 Apr 17;3(3):100310. doi: 10.1016/j.xops.2023.100310 (PMC10183658; doi:10.1016/j.xops.2023.100310), 2023-04-17
Supplement: mmc4.pdf [file mmc4.pdf]

**Supplemental Table S6:** Correlation of average circumpapillary vessel density (cpVD) of both eyes and T cell counts or cytokine levels in all participants and in POAG patients

| <b>All Participants (POAG and Controls)</b>             | <b>Pearson correlation coefficient (r)</b> | <b>P-value</b> |
|---------------------------------------------------------|--------------------------------------------|----------------|
| HSP27 stimulated Th1 cells (% , [n=41])                 | -0.20                                      | 0.20           |
| HSP27 stimulated Treg cells (% , [n=42])                | -0.10                                      | 0.55           |
| $\alpha$ -crystallin stimulated Th1 cells (% , [n=27])  | -0.26                                      | 0.19           |
| $\alpha$ -crystallin stimulated Treg cells (% , [n=27]) | 0.13                                       | 0.53           |
| Interferon- $\gamma$ (pg/ml, [n=56])                    | -0.40                                      | <b>0.002</b>   |
| <b>POAG Patients</b>                                    | <b>Pearson correlation coefficient (r)</b> | <b>P-value</b> |
| HSP27 stimulated Th1 cells (% , [n=25])                 | -0.12                                      | 0.58           |
| HSP27 stimulated Treg cells (% , [n=26])                | -0.11                                      | 0.59           |
| $\alpha$ -crystallin stimulated Th1 cells (% , [n=17])  | -0.03                                      | 0.91           |
| $\alpha$ -crystallin stimulated Treg cells (% , [n=17]) | 0.08                                       | 0.76           |
| Interferon- $\gamma$ (pg/ml, [n=28])                    | -0.09                                      | 0.66           |

Significant p-value are in bold.

Abbreviations: HSP, heat shock protein; Th1 cells, T helper type 1 cells; Treg cells, regulatory T cells.
