# Supplementary material for: Association between HSP-Specific T-Cell Counts and Retinal Nerve Fiber Layer Thickness in Patients with Primary Open-Angle Glaucoma
Source: PubMed Central journal article supplement — Ophthalmol Sci. 2023 Apr 17;3(3):100310. doi: 10.1016/j.xops.2023.100310 (PMC10183658; doi:10.1016/j.xops.2023.100310), 2023-04-17
Supplement: mmc5.pdf [file mmc5.pdf]

**Supplemental Table S8:** Partial correlation of T cell counts or cytokine levels with number of glaucoma medications for POAG patients adjusting for average HVF MD

|                                                         | <b>Pearson correlation coefficient (r)</b> | <b>P-value</b> |
|---------------------------------------------------------|--------------------------------------------|----------------|
| HSP27 stimulated Th1 cells (% , [n=28])                 | 0.06                                       | 0.75           |
| HSP27 stimulated Treg cells (% , [n=29])                | -0.01                                      | 0.97           |
| $\alpha$ -crystallin stimulated Th1 cells (% , [n=20])  | 0.31                                       | 0.19           |
| $\alpha$ -crystallin stimulated Treg cells (% , [n=20]) | 0.31                                       | 0.19           |
| Interferon- $\gamma$ (pg/ml, [n=32])                    | -0.12                                      | 0.51           |

Abbreviations: POAG, primary open-angle glaucoma; HVF, Humphrey visual field; MD, mean deviation; HSP, heat shock protein; Th1 cells, T helper type 1 cells; Treg cells, regulatory T cells.
