# Supplementary material for: Association between HSP-Specific T-Cell Counts and Retinal Nerve Fiber Layer Thickness in Patients with Primary Open-Angle Glaucoma
Source: PubMed Central journal article supplement — Ophthalmol Sci. 2023 Apr 17;3(3):100310. doi: 10.1016/j.xops.2023.100310 (PMC10183658; doi:10.1016/j.xops.2023.100310), 2023-04-17
Supplement: mmc6.pdf [file mmc6.pdf]

### **Supplemental Appendix 1: Method for serum heat shock protein (HSP) antibody level measurements**

To evaluate the serum levels of anti-HSPs antibodies, medium-bind 96-well plates (Greiner Bio-One) were pre-coated with commercially available full-length recombinant human  $\alpha$  crystallin (Enzo Life Sciences), HSP27 (Enzo Life Sciences), or HSP60 (Enzo Life Sciences) proteins at a concentration of 1  $\mu$ g/ml and incubated in ELISA Coating Buffer (BioLegend) containing 10% normal goat serum (Sigma-Aldrich) at room temperature for 2 hours. Sera diluted (1:10) in 1xPBS containing 1% BSA were added to the well. Anti- $\alpha$  crystallin (Thermo Scientific), anti-HSP27(Thermo Scientific) or anti-HSP60 antibody (Thermo Scientific) was used as a positive control that was added in replacement of diluted sera, and incubated for 2 hours at room temperature. Plates were then incubated with horseradish peroxidase (HRP)-conjugated anti-human IgG (1:1,000, Novus Biologicals) at room temperature for 30 minutes. The TMB substrate solution (R&D system) was added to visualize HRP enzymatic reaction, and optical density was evaluated at 450 nm using an automatic microplate reader (SYNERGY H1 and Gen 5<sup>TM</sup> Imager Software, BioTek.). All samples were performed in duplicate.
